# Supplementary material
Source: PubMed Central journal article supplement (PMC8176768)
Supplement: bloodBLD2020007450-suppl1.pdf [file bloodBLD2020007450-suppl1.pdf]

# **Hematological disorder associated *Cxcr4*-gain-of-function mutation leads to uncontrolled extrafollicular immune response**

Nagham Alouche<sup>1,2\*</sup>, Amélie Bonaud<sup>1,3\*</sup>, Vincent Rondeau<sup>1,3</sup>, Rim Hussein-Agha<sup>1</sup>, Julie Nguyen<sup>2</sup>, Valeria Bisio<sup>1,3</sup>, Mélanie Khamyath<sup>1,3</sup>, Etienne Crickx<sup>4</sup>, Niclas Setterblad<sup>5</sup>, Nicolas Dulphy<sup>1,3</sup>, Matthieu Mahevas<sup>4</sup>, David H. McDermott<sup>6</sup>, Philip M. Murphy<sup>6</sup>, Karl Balabanian<sup>1,3#</sup>, Marion Espéli<sup>1,3#§</sup>

<sup>1</sup> Université de Paris, Institut de Recherche Saint Louis, EMiLy, Inserm U1160, F-75010 Paris, France

<sup>2</sup> Inflammation Chemokines and Immunopathology, Institut National de la Santé et de la Recherche Médicale (INSERM), Faculté de Médecine, Université Paris-Sud, Université Paris-Saclay, Clamart, France

<sup>3</sup> CNRS, GDR3697 "Microenvironment of tumor niches", Micronit, France.

<sup>4</sup> Institut Necker-Enfants Malades-INSERM U1151/Centre National de la Recherche (CNRS) UMR8633, Université Paris Descartes, Faculté de Médecine, Paris, France.

<sup>5</sup> Institut de Recherche Saint Louis, Paris, France. Université Paris Diderot, Sorbonne Paris Cité, Paris, France

<sup>6</sup> Molecular Signaling Section, Laboratory of Molecular Immunology, National Institute of Allergy and Infectious Diseases, National Institutes of Health, Bethesda, MD, 20892, USA.

## **Supplementary Materials**

## **Supplementary methods:**

### **qRT-PCR**

Total cellular RNA was extracted from samples using the RNeasy Plus Mini kit (Qiagen) and reverse transcribed with pd(T)-15 (Roche) and Moloney Murine Leukemia Virus reverse transcriptase (Invitrogen). Amplification of cDNAs was performed by quantitative real-time PCR reactions on a Light Cycler instrument (LC480, Roche Diagnostics) with the Light Cycler 480 SYBR Green detection kit (Roche Diagnostics) using the primers listed in Supplementary Table 2. *Actb* was used as the reference standard for normalization and relative quantification of fold differences in mRNA expression was determined by the comparative delta-delta-CT ( $2^{-\Delta\Delta CT}$ ) method.

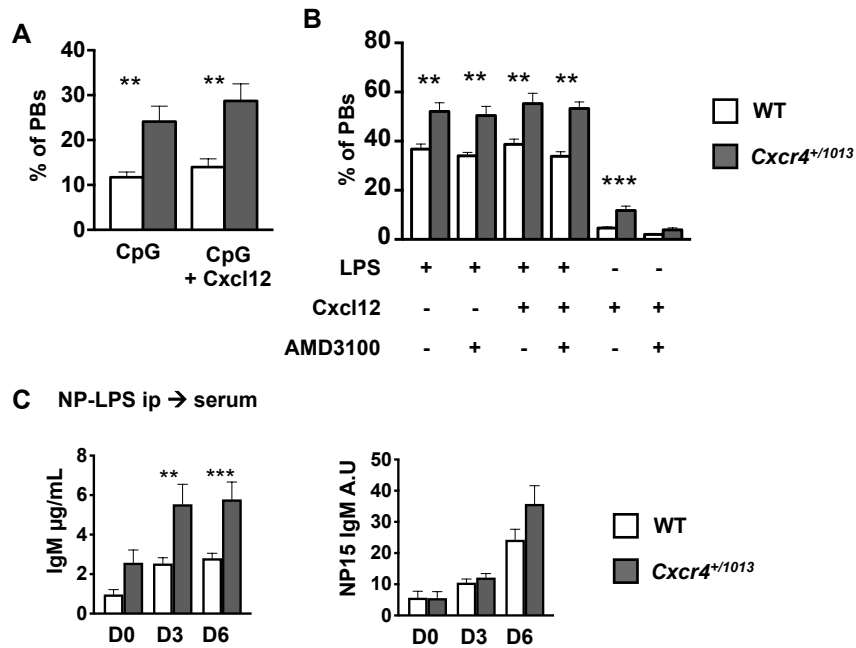

**Supplementary figure 1: The gain of function of *Cxcr4* enhances TLR-dependent plasmablast differentiation:** (A) Splenic B cells were cultured in presence of CpG or CpG+Cxcl12 for 4 days, the percentage of generated PBs was assessed by FACS (B) Splenocytes were cultured in presence of LPS and/or Cxcl12 and/or AMD3100. The frequency of PBs generated was assessed by FACS. (C) Serum titers of both total IgM<sup>+</sup> and NP15-IgM<sup>+</sup> from both genotypes were measured by ELISA at day 0, 3 and 6 post immunization with NP-LPS. Results are from 2 (A-B) or 3 (C) independent experiments (Mean ± SEM, n=3-4 for A-B; n=5-13 for C-G). Mann-Whitney U test was used to assess statistical significance (\*P<0.05, \*\* P<0.01, \*\*\* P<0.001).

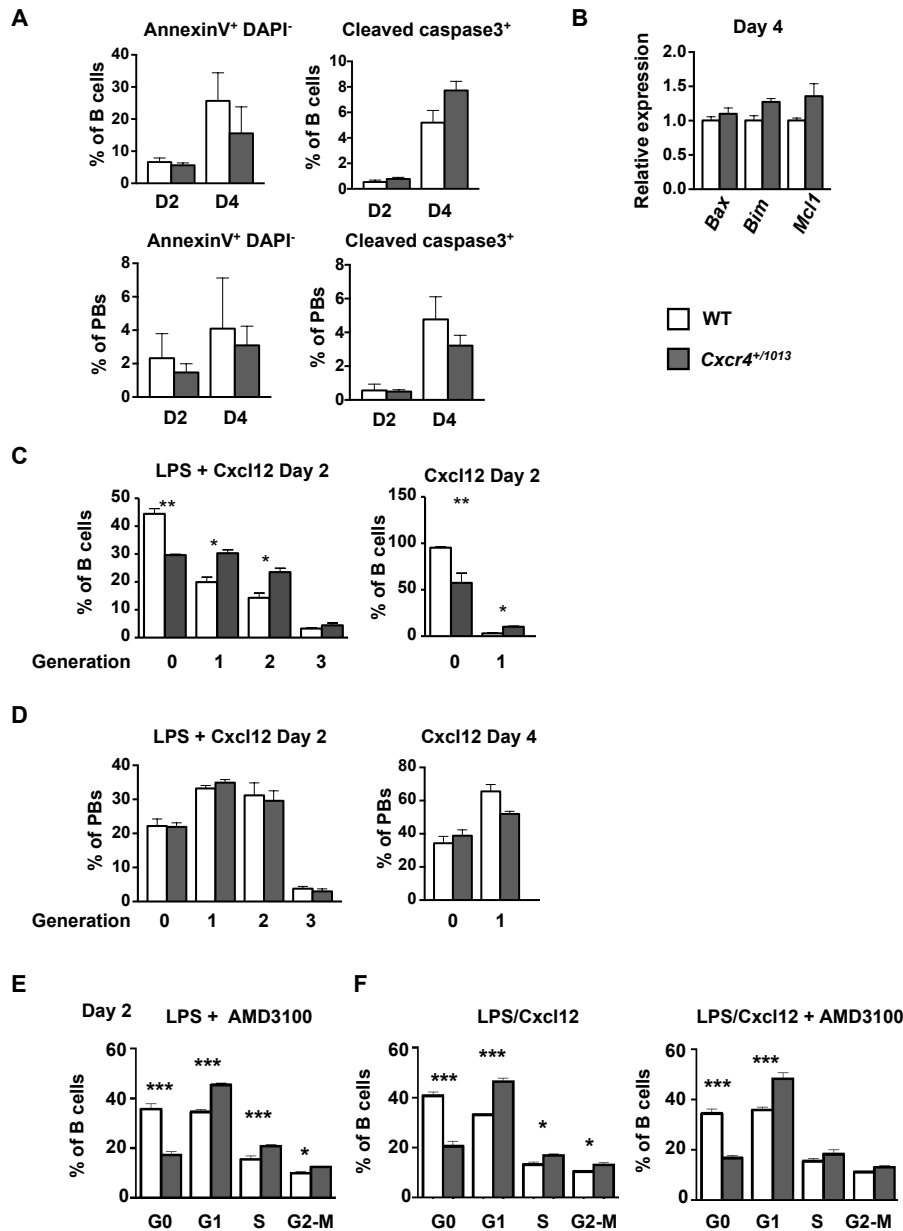

**Supplementary figure 2: *Cxcr4* desensitization controls LPS-mediated B cell cycling but not apoptosis:** (A-B) Splenocytes from WT and *Cxcr4*<sup>+1013</sup> mice were cultured in presence of LPS for 4 days. (A) Apoptosis was assessed by measuring the frequency of Annexin V and cleaved caspase 3 positive B cells (top) and PBs (bottom) from both genotypes at the indicated time points. (B) Expression of *Bax*, *Bim* and *Mcl1* was measured by qPCR on cDNA from cells from both genotypes cultured for 4 days. Expression levels were normalized to the level of *Actb* transcripts. The fold change compared to WT B cell expression is shown. (C-D) Splenocytes from WT and *Cxcr4*<sup>+1013</sup> mice were loaded with CTV and cultured in presence of Cxcl12 +/- LPS for up to 4 days. The frequency of B cells (C) and PBs (D) present in each generation based on the CTV-dilution at day 2 or 4 is shown. (E-F) Frequency of splenic B cells in each cell cycle phase at day 2 post LPS +/- Cxcl12 stimulation in presence or in absence of AMD3100. Results are from one representative experiment out of 2 (A-D) or from two independent experiments (E-F) (Mean  $\pm$  SEM, n=2-4 for (A-D); n=8 for (E-F)). Mann-Whitney U test was used to assess statistical significance (\*P<0.05, \*\* P<0.01, \*\*\* P<0.001).

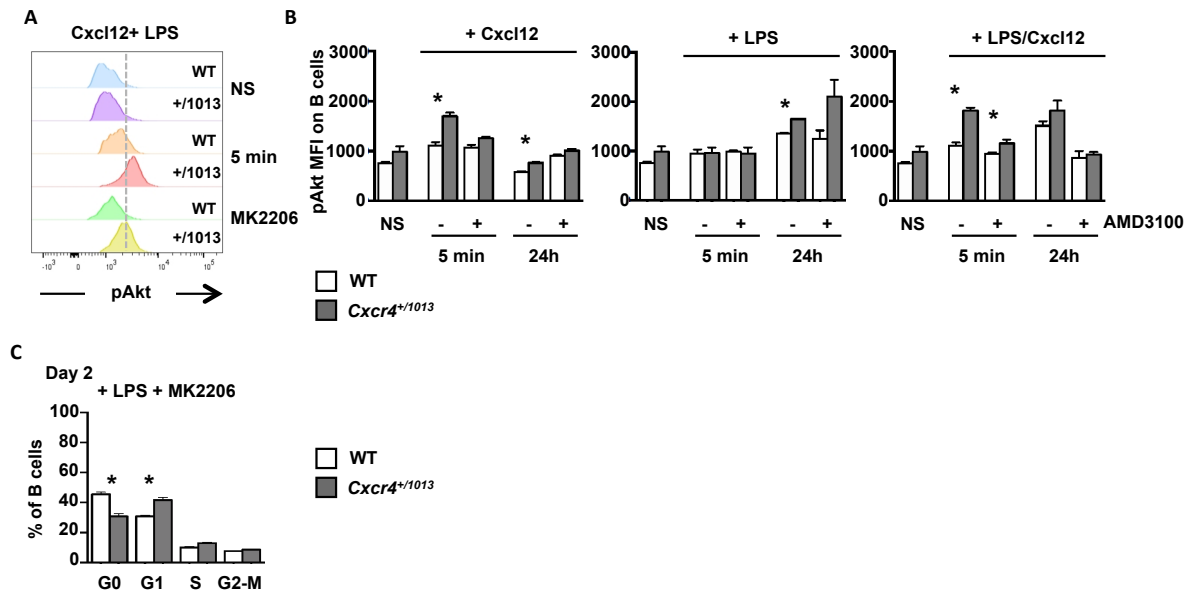

**Supplementary figure 3: Exacerbated Akt signaling in *Cxcr4<sup>+/-1013</sup>* mutant B cells: (A)** Representative histograms for pAkt (Ser473) in splenic B cells non-stimulated (NS) or stimulated for 5 minutes with LPS and Cxcl12 in presence or in absence of the MK-2206 inhibitor. **(B)** Quantification of the MFI of pAkt staining on B cells non-stimulated, stimulated for 5 minutes or 24 hours with Cxcl12, LPS or a combination of both in presence or in absence of AMD3100. **(C)** Frequency of splenic B cells in each cell cycle phase at day 2 post LPS stimulation in presence of MK-2206. Results are from one representative experiment out of 2-3 (Mean ± SEM, n=4). Mann-Whitney U test was used to assess statistical significance (\*P<0.05).

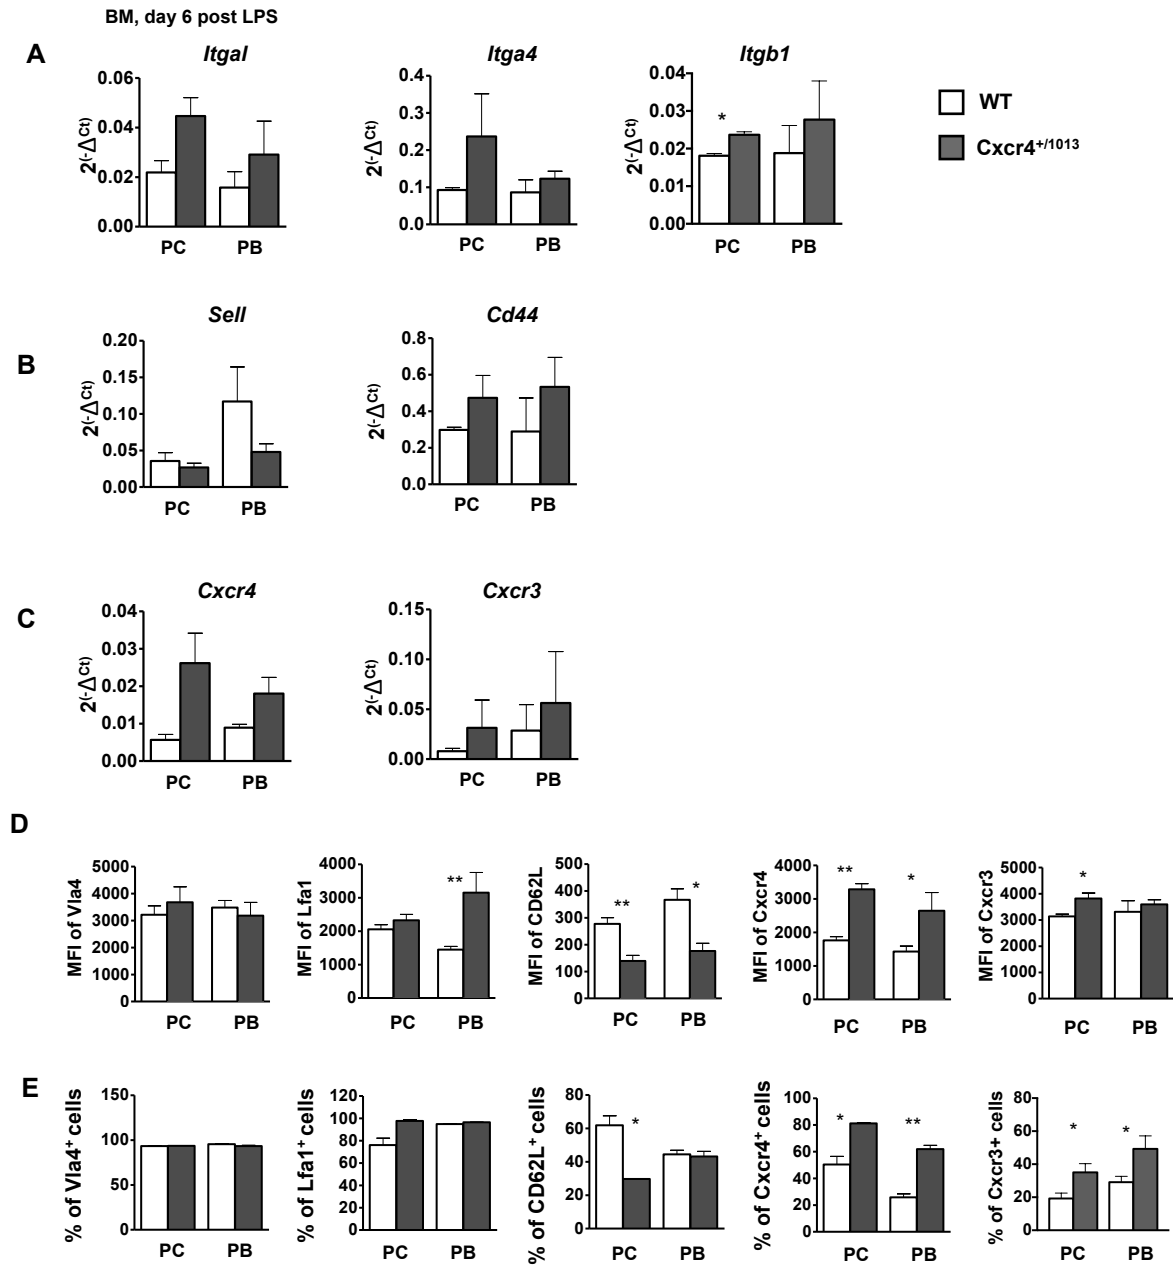

**Supplementary figure 4: *Cxcr4* desensitization modulates the migratory/adhesive properties of BM plasmablasts and plasma cells: (A-C)** Relative expression of selected transcripts in BM PBs and PCs from both *Cxcr4*<sup>+1013</sup> and WT mice at day 6 post immunization. Data are presented as ( $2^{-\Delta Ct}$ ). **(D-E)** Flow cytometry-based quantification of the surface expression of selected adhesion molecules and chemokine receptors on BM PBs and PCs from both WT and *Cxcr4*<sup>+1013</sup> mice. Data are presented as MFI (geometrical mean) **(D)** and as a percentage of positive cells **(E)**. Results are from one experiment (A-C) or from 2-3 independent experiments (D-E) (Mean  $\pm$  SEM, n=2 for A-C and n=5-10 for D-E). Two-tailed Student's T test (A-C) and Mann-Whitney U test (D-E) were used to assess statistical significance (\* $P < 0.05$ ).

**Table S1. List of antibodies used in flow cytometry and immunofluorescence**

| <b>Antibody</b>                        | <b>Clone</b> | <b>Host/Isotype</b>        | <b>Supplier</b> |
|----------------------------------------|--------------|----------------------------|-----------------|
| Mouse flow cytometry                   |              |                            |                 |
| Anti-CD138                             | 281-2        | Rat IgG2a, κ               | BD Biosciences  |
| Anti-CD45R/B220                        | RA3-6B2      | Rat / IgG2a, kappa         | BD Biosciences  |
| Anti-CD19                              | 1D3          | Rat IgG2a, κ               | BD Biosciences  |
| Anti-CD21/35                           | 7G6          | Rat gG2b, κ                | BD Biosciences  |
| Anti-CD23                              | B3B4         | Rat IgG2a, κ               | BD Biosciences  |
| Anit-Vla-4 (CD49d)                     | R1-2         | Rat IgG2b, κ               | BD Biosciences  |
| Anti-Lfa-1 (CD11a)                     | 2D7          | Rat IgG <sub>2a</sub> , κ  | BD Biosciences  |
| Anti-CD62L                             | MEL 14       | Rat IgG <sub>2a</sub> , κ  | BD Biosciences  |
| Anti-Ki-67                             | B56          | Mouse IgG <sub>1</sub> , κ | BD Biosciences  |
| Anti-Cxcr4                             | 2B11         | Rat / IgG2b, kappa         | BD Biosciences  |
| Anti-Cxcr3                             | HTK888       | Armenian Hamster IgG       | BioLegend       |
| PE Annexin-V Apoptosis Detection Kit I |              |                            | BD Pharmingen   |
| V450-anti-cleaved caspase-3            |              |                            | BD Biosciences  |
| Anti-KI67 Alexa fluor 700              | B56          | mouse IgG1                 | BD Biosciences  |
| Anti-Akt (pS473)                       | M89-61       | Mouse IgG1, κ              | BD Biosciences  |
| Anti-S6 (p 235/236)                    | D57.2.2E     | Rabbit IgG                 | Cell signaling  |
| Mouse immunofluorescence               |              |                            |                 |
| Anti-Laminin                           |              | Rabbit IgG                 | Sigma Aldrich   |
| anti-mouse IgM Alexa fluor 594         |              | Goat IgG                   | Thermofisher    |
| anti-Rabbit IgG Alexa fluor 488        |              | Goat IgG                   | Thermofisher    |
| Human flow cytometry                   |              |                            |                 |
| Anti-CD3 FITC                          | OKT3         |                            | BD Biosciences  |
| Anti-CD19 APC-Cy7                      | SJ25C1       |                            | BD Biosciences  |
| Anti-CD38 BV786                        | HIT2         |                            | BD Biosciences  |
| Anti-CD27 BV650                        | L128         |                            | BD Biosciences  |
| Anti-CD138 BV605                       | MI15         |                            | BD Biosciences  |
| Viability dye e506                     |              |                            | eBioscience     |

**Table S2. List of primers used for RT-qPCR**

|                      | <b>Gene</b>              | <b>Reference/ Primers</b> |
|----------------------|--------------------------|---------------------------|
| <b>Taqman assays</b> | <i>Gapdh</i>             | Mm99999915_g1             |
|                      | <i>Actb</i>              | Mm01205647_g1             |
|                      | <i>Prdm1</i>             | Mm00476128_m1             |
|                      | <i>Xbp1</i>              | Mm00457357_m1             |
|                      | <i>Irf4</i>              | Mm00516431_m1             |
|                      | <i>Pax5</i>              | Mm00435501_m1             |
|                      | <i>Cd3e</i>              | Mm00599684_g1             |
|                      | <i>Cxcr3</i>             | Mm00438259_m1             |
|                      | <i>Cxcr4</i>             | Mm01292123_m1             |
|                      | <i>Cxcr5</i>             | Mm00432086_m1             |
|                      | <i>Ccr7</i>              | Mm01301785_m1             |
|                      | <i>Ccr10</i>             | Mm01292449_m1             |
|                      | <i>Cd62l / sell</i>      | Mm00441291_m1             |
|                      | <i>Cd11a/Itgal/LFA-1</i> | Mm00801807_m1             |
|                      | <i>Cd49d/Itga4</i>       | Mm01277951_m1             |
|                      | <i>Cd29/Itgb1</i>        | Mm01253230_m1             |
|                      | <i>Cd44</i>              | Mm01277161_m1             |
|                      | <i>Klf2</i>              | Mm00500486_g1             |
|                      | <i>Bach2</i>             | Mm00464379_m1             |
|                      | <i>Ackr4</i>             | Mm02620636_s1             |
|                      | <i>Tnfrsf13c</i>         | Mm00840578_g1             |
|                      | <i>Tnfrsf17</i>          | Mm00495682_m1             |
|                      | <i>Tnfrsf13b</i>         | Mm00495682_m1             |
|                      | <i>Cxcl9</i>             | Mm03047441_m1             |
|                      | <i>Cxcl10</i>            | Mm00445235_m1             |
|                      | <i>Cxcl12</i>            | Mm00445553_m1             |
|                      | <i>Tnfsf13b</i>          | Mm00446347_m1             |
|                      | <i>Il12p35</i>           | Mm00434169_m1             |
|                      | <i>Il10</i>              | Mm01288386_m1             |
|                      | <i>TNFa</i>              | Mm00443258_m1             |
|                      | <i>Glg1</i>              | Mm00486029_m1             |
|                      | <i>F11r</i>              | Mm00554113_m1             |
|                      | <i>Gja1</i>              | Mm01179639_s1             |
|                      | <i>CD11b</i>             | Mm00434455_m1             |
|                      | <i>ICAM1</i>             | Mm00516023_m1             |
|                      | <i>Itga5</i>             | Mm00439797_m1             |
|                      | <i>Itgb7</i>             | Mm00442916_m1             |
|                      | <i>Cd61</i>              | Mm00443980_m1             |
|                      | <i>MKi67</i>             | Mm01278617_m1             |
|                      | <i>Bcl2</i>              | Mm00477631_m1             |
|                      | <i>Cdt1</i>              | Mm00466006_m1             |
| <i>Gmnn</i>          | Mm00517463_m1            |                           |



|                                  |               |                                                    |
|----------------------------------|---------------|----------------------------------------------------|
|                                  | <i>Ccnd1</i>  | Mm00432359_m1                                      |
|                                  | <i>Ccnd2</i>  | Mm00438070_m1                                      |
|                                  | <i>Ccnd3</i>  | Mm01612362_m1                                      |
|                                  | <i>Ccne1</i>  | Mm01266311_m1                                      |
|                                  | <i>Ccne2</i>  | Mm00438077_m1                                      |
|                                  | <i>Ccna2</i>  | Mm00438063_m1                                      |
|                                  | <i>Ccnb1</i>  | Mm02015429_g1                                      |
|                                  | <i>Ccnb2</i>  | Mm01171453_m1                                      |
|                                  | <i>Fh</i>     | Mm01321349_m1                                      |
|                                  | <i>Slc2a1</i> | Mm00441480_m1                                      |
|                                  | <i>Ldha</i>   | Mm01612132_g1                                      |
|                                  | <i>Ldhb</i>   | Mm00493146_m1                                      |
|                                  | <i>Nr4a1</i>  | Mm01300401_m1                                      |
|                                  | <i>Hk1</i>    | Mm00439344_m1                                      |
|                                  | <i>Hk2</i>    | Mm00443385_m1                                      |
|                                  | <i>CMyc</i>   | Mm00487804_m1                                      |
|                                  | <i>Slc1a5</i> | Mm00436603_m1                                      |
|                                  | <i>Slc3a2</i> | Mm00500521_m1                                      |
|                                  | <i>Dgat1</i>  | Mm00515643_m1                                      |
|                                  | <i>Cpt1a</i>  | Mm01231183_m1                                      |
|                                  | <i>Hif1</i>   | Mm00468869_m1                                      |
| <b>SYBR<br/>Green<br/>assays</b> | <i>Mcl1</i>   | Forward: 5' GATCATCTCGCGCTACTTGC 3'                |
|                                  |               | Reverse: 5' CTGATGCCGCCTTCTAGGTC 3'                |
|                                  | <i>Bax</i>    | Forward: 5' ACACTGGACTTCCTCCGTGA 3'                |
|                                  |               | Reverse: 5' TCCTAATGCCAACCTGTGAAGT 3'              |
|                                  | <i>Bim</i>    | Forward: 5' GAGTTGTGACAAGTCAACACAAACC 3'           |
|                                  |               | Reverse:<br>5' GAAGATAAAGCGTAAACAGTTGTAAGATAACC 3' |
